# Supplementary material
Source: PubMed Central journal article supplement (PMC3646463)
Supplement: supp_M035048_jlr.M035048-2.pdf [file supp_M035048_jlr.M035048-2.pdf]

**Table S1. Sequence of Primers used for Quantitative RT-PCR (qRT-PCR).**

| <b>Symbol</b> | <b>Name</b>                                                     | <b>Primers</b>                                |
|---------------|-----------------------------------------------------------------|-----------------------------------------------|
| <i>Spt1</i>   | <i>Serine-palmitoyl transferase 1</i>                           | TTTCCGGTTTAAAAGTGGTG<br>CTGATGCTTGGAGGAGGAAG  |
| <i>Spt2</i>   | <i>Serine-palmitoyl transferase 2</i>                           | CATTGAGTCCAGAGCCAGAT<br>ACACACTGTCCTGGGAGGAA  |
| <i>CerS2</i>  | <i>Ceramide synthase 2</i>                                      | TGCCAAGATGTTAACTACGC<br>TAGCCAAAGAAGGCAGGGTA  |
| <i>CerS4</i>  | <i>Ceramide synthase 4</i>                                      | GGTGCATGCTCTCTTCATC<br>GCTGTGGACCTTCAGAACTG   |
| <i>Gcs</i>    | <i>Glucoceramidesynthase</i>                                    | GCCATGCAAACTCTGGTTC<br>TGGACACCCCTGAGTTGAAT   |
| <i>Gba</i>    | <i>Glucosidase, beta, acid</i>                                  | CCCCATTATTGTCGACATCC<br>TCGGTTTAAACACGACCACAA |
| <i>aSMase</i> | <i>acid Sphingomyelinase</i>                                    | CAGTTCTTTGGCCACTCA<br>TCCGGGGTAGTTCCATCTA     |
| <i>nSMase</i> | <i>neutral Sphingomyelinase</i>                                 | ACGTGCTTACAAGGCAGTC<br>AGGACACACAGCAACACCAG   |
| <i>Cerk</i>   | <i>Ceramide kinase</i>                                          | GTCCTTCCCTCCAGCACAG<br>GCACTTCCGGATAAGGATGA   |
| <i>Asah1</i>  | <i>Acyl-sphingosine amidohydrolases 1( acid<br/>Ceramidase)</i> | GCCCAGTGGGTAGGGTTTAT<br>CACATACCATCTGCCATGCT  |
| <i>Sphk1</i>  | <i>Sphingosine kinase 1</i>                                     | GATGCATGAGGTGGTGAATG<br>AACAGCAGTGTGCAGTTGAT  |
| <i>Sphk2</i>  | <i>Sphingosine kinase 2</i>                                     | GAAGGCATTGTCCTGTGTC<br>GCAGAGAAGAAGCGAGCAGT   |
| <i>S1pp1</i>  | <i>Sphingosine-1-phosphate phosphatase 1</i>                    | GGGCTGATTCTCATTCCCTG<br>AAATCAAGTGAAGCCCGATG  |
| <i>Sgpl1</i>  | <i>Sphingosine-1-phosphate lyase 1</i>                          | GATGTCTGCTAAGGGGTGGA<br>ATAGATGGCACCCATTCTG   |
| <i>SIP1</i>   | <i>SIP receptors 1</i>                                          | GGATCGCGCGGTGTAGAC<br>GCTAGAGGGCGAGGTTGAG     |
| <i>SIP2</i>   | <i>SIP receptors 2</i>                                          | CACTATGTGCTCTGCGTGGT<br>GGCGATGTAGGCATATGCA   |
| <i>SIP3</i>   | <i>SIP receptors 3</i>                                          | CCTCATCACCACCATCTCT<br>TGGAGTAGAGGGGCAAGATG   |
| <i>Gfap1</i>  | <i>Glial fibrillary acidic protein 1</i>                        | GCCAGTTACCAGGAGGCACT<br>ATGGTGATGCGGTTTTCTTC  |
| <i>Ho1</i>    | <i>Heme oxygenase 1</i>                                         | TCTATCGTGCTCGCATGAAC<br>CTGTCTGTGAGGGACTCTGG  |
| <i>Fosl1</i>  | <i>FOS-like antigen 1</i>                                       | AGAGCGGAACAAGCTAGCAG<br>CAAGTACGGGTCTGAGAA    |
| <i>Icam1</i>  | <i>Intercellular adhesion molecule 1</i>                        | TCAAACGGGAGATGAATGGT<br>AGTTTTAGGGCCTCCTCTG   |
| <i>Ccl2</i>   | <i>Chemokine (C-C motif) ligand 2</i>                           | GTTAATGCCCACTCACCTG<br>TTCCTTATTGGGGTCAGCAC   |
| <i>Cxcl1</i>  | <i>Chemokine (C-X-C motif) ligand 1</i>                         | TAGCCCACTCAAGAATGGT<br>CTCCATTACTGGGGACACC    |

|               |                                                     |                                                         |
|---------------|-----------------------------------------------------|---------------------------------------------------------|
| <i>Cxcl10</i> | <i>Chemokine (C-X-C motif) ligand 10</i>            | <i>CATCGACTTCCATGAACAGC<br/>TCTTGATGGCCTCAGATTCC</i>    |
| <i>Il1b</i>   | <i>Interleukin 1, beta</i>                          | <i>CTGAAAGCTCTCCACCTCAA<br/>AACCGCTTTTCCATCTTCTT</i>    |
| <i>Il6</i>    | <i>Interleukin 6</i>                                | <i>TGTGCAATGGCAATTCTGAT<br/>GGAAGTTGGGGTAGGAAGGA</i>    |
| <i>Gapdh</i>  | <i>Glyceraldehyde-3-phosphate<br/>dehydrogenase</i> | <i>CTGAACGGGAAGCTCACTG<br/>ACCACCCTGTTGCTGTAGC</i>      |
| <i>Rpl-19</i> | <i>Ribosomal protein L19</i>                        | <i>TCGTGCTTCCTTGGTCTTAG<br/>TCACAGCCTGTACCTGAAGG</i>    |
| <i>Hprt</i>   | <i>Hypoxanthine phosphoribosyltransferase</i>       | <i>TTGGGGCTGTACTGCTTAACC<br/>CTTTGCTGACCTGCTGGATTAC</i> |
